# Supplementary material for: Structural, transport, magnetic and magnetoelectric properties of CaMn1−xFexO3−δ (0.0 ≤ x ≤ 0.4)
Source: Royal Society of Chemistry journal article supplement (doi:10.1039/c5ra03565a), 2015-01-01
Supplement: c5ra03565a1.pdf [file c5ra03565a1.pdf]

Supplementary information :

**Structural, transport, magnetic and magnetoelectric properties of  $\text{CaMn}_{1-x}\text{Fe}_x\text{O}_{3-\delta}$  ( $0.0 \leq x \leq 0.4$ )**

**Brajendra Singh**

*Centre of Material Sciences, University of Allahabad, Allahabad - 211002*

*E-mail: brajendr@gmail.com; brajendr@allduniv.ac.in*

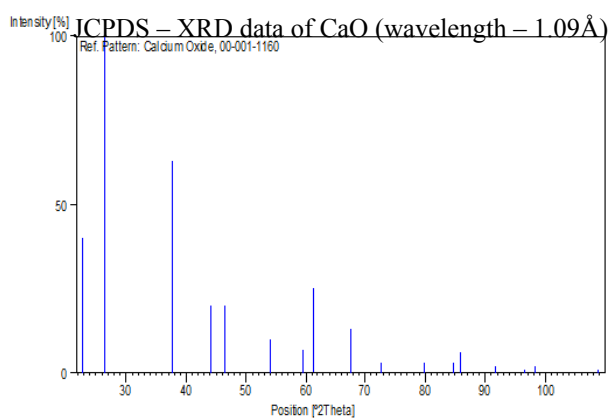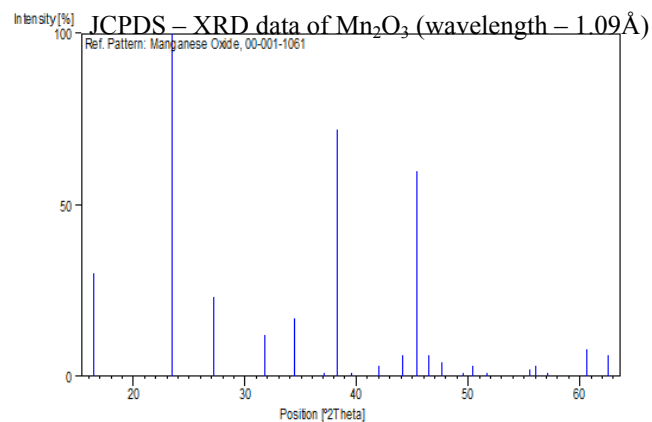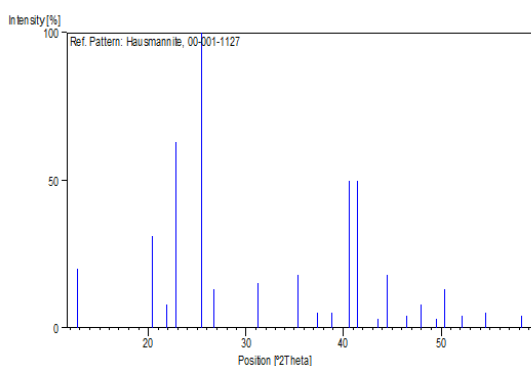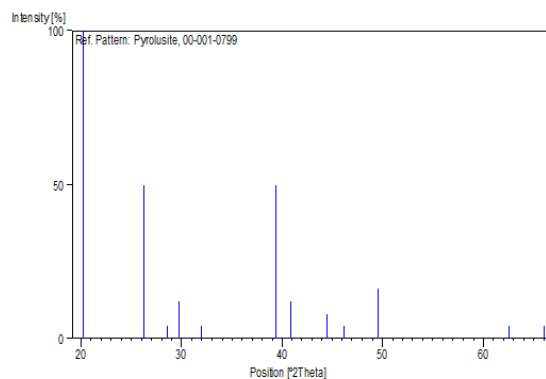

JCPDS – XRD data of  $\text{Mn}_3\text{O}_4$  (wavelength – 1.09Å)

JCPDS – XRD data of  $\text{MnO}_2$  (wavelength – 1.09Å)

Table II: Comparison of the reported in literature (calculated and experimentally recorded frequencies of the Raman – active modes in LaMnO<sub>3</sub>, CaMnO<sub>3</sub>) with Mn<sup>+3</sup>/Mn<sup>+4</sup> mixed valences containing CaMnO<sub>3-δ</sub>. \* frequencies are observed because of ( Mn<sup>+3</sup> – O ) vibrations. Bold Frequencies in bold fonts indicate Raman lines with highest intensity.

| Mode<br>Symmetry | LaMn <sup>+3</sup> O <sub>3</sub> |            | CaMn <sup>+4</sup> O <sub>3</sub> |            | CaMn <sup>+3/+4</sup> O <sub>3-δ</sub> |
|------------------|-----------------------------------|------------|-----------------------------------|------------|----------------------------------------|
|                  | Calc.<br>Ref <sup>34</sup>        | Expt.      | Calc.<br>Ref <sup>34</sup>        | Expt.      | Expt.<br>This Paper                    |
| A <sub>g</sub>   | 582                               | -          | 555                               | -          |                                        |
| A <sub>g</sub>   | 480                               | <b>493</b> | 467                               | <b>487</b> | <b>483</b>                             |
| A <sub>g</sub>   | 263                               | -          | 345                               | 322        |                                        |
| A <sub>g</sub>   | 162                               | 198        | 299                               | 278        | <b>273</b>                             |
| A <sub>g</sub>   | 81                                | 140        | 242                               | 243        | <b>238</b>                             |
| A <sub>g</sub>   | 326                               | <b>284</b> | 200                               | 184        | 215, 295*                              |
| A <sub>g</sub>   | 246                               | 257        | 154                               | 160        | 155                                    |
| B <sub>2g</sub>  | 669                               | <b>611</b> | 749                               | -          | <b>607*</b>                            |
| B <sub>2g</sub>  | 509                               | -          | 485                               | -          |                                        |
| B <sub>2g</sub>  | 464                               | 481        | 453                               | <b>465</b> | <b>463</b>                             |
| B <sub>2g</sub>  | 369                               | 308        | 366                               | -          | 371*                                   |
| B <sub>2g</sub>  | 150                               | 170        | 292                               | -          |                                        |
| B <sub>2g</sub>  | 123                               | 109        | 232                               | <b>258</b> | 255, 116*                              |
| B <sub>2g</sub>  | 218                               | -          | 148                               | -          |                                        |
| B <sub>1g</sub>  | 693                               | -          | 743                               | -          |                                        |
| B <sub>1g</sub>  | 575                               | -          | 536                               | -          |                                        |
| B <sub>1g</sub>  | 182                               | 184        | 354                               | -          |                                        |
| B <sub>1g</sub>  | 347                               | -          | 281                               | -          |                                        |
| B <sub>1g</sub>  | 254                               | -          | 178                               | 179        | 172                                    |
| B <sub>3g</sub>  | 692                               | -          | 754                               | -          | <b>718</b>                             |
| B <sub>3g</sub>  | 603                               | -          | 541                               | <b>564</b> | <b>576</b>                             |
| B <sub>3g</sub>  | 462                               | -          | 459                               | -          |                                        |
| B <sub>3g</sub>  | 343                               | 320        | 304                               | 320        | 314                                    |
| B <sub>3g</sub>  | 158                               | -          | 290                               | -          |                                        |

Table III: Comparison of the reported in literature [calculated and experimentally recorded frequencies of the Raman – active modes of  $\text{CaFeO}_3$  (CFO) and  $\text{La}_{0.33}\text{Sr}_{0.67}\text{FeO}_3$  (LSFO)] with  $\text{CaMn}_{1-x}\text{Fe}_x\text{O}_{3-\delta}$ . Bold Frequencies in bold fonts indicate Raman lines with highest intensity.

| CMO<br>Ref <sup>34</sup> | CFO<br>Ref <sup>38</sup> | LSFO<br>Ref <sup>38</sup> | CaMn <sub>1-x</sub> Fe <sub>x</sub> O <sub>3-δ</sub> (This Paper) |            |            |            |
|--------------------------|--------------------------|---------------------------|-------------------------------------------------------------------|------------|------------|------------|
|                          |                          |                           | x =                                                               | 0.1        | 0.2        | 0.3        |
| -                        | -                        | -                         | 115                                                               | 107        | 116        | -          |
| -                        | 149                      | -                         | -                                                                 | -          | -          | -          |
| 160                      | -                        | -                         | 163                                                               | -          | -          | -          |
| 179                      | -                        | -                         | -                                                                 | -          | -          | -          |
| 184                      | -                        | -                         | -                                                                 | -          | -          | -          |
| -                        | 197                      | -                         | -                                                                 | -          | 211        | -          |
| -                        | 218                      | -                         | 226                                                               | 233        | 239        | -          |
| -                        | -                        | 251                       | -                                                                 | 247        | -          | -          |
| 243                      | -                        | -                         | -                                                                 | -          | -          | -          |
| <b>258</b>               | -                        | -                         | -                                                                 | -          | -          | -          |
| 278                      | -                        | -                         | 277                                                               | -          | -          | 279        |
| -                        | 305                      | 307                       | -                                                                 | -          | -          | -          |
| 320                      | -                        | -                         | 315                                                               | 313        | -          | -          |
| 322                      | -                        | -                         | -                                                                 | -          | -          | -          |
| -                        | -                        | 380                       | -                                                                 | -          | -          | -          |
| <b>465</b>               | -                        | -                         | <b>444</b>                                                        | -          | -          | -          |
| <b>487</b>               | -                        | -                         | <b>470</b>                                                        | <b>476</b> | <b>474</b> | <b>473</b> |
|                          |                          |                           | <b>516</b>                                                        | <b>546</b> | -          | -          |
| <b>564</b>               | -                        | -                         | <b>547</b>                                                        | <b>564</b> | <b>546</b> | <b>546</b> |
|                          |                          |                           | <b>643</b>                                                        | -          | -          | -          |
| -                        | <b>707</b>               | <b>704</b>                | <b>715</b>                                                        | <b>708</b> | <b>709</b> | <b>706</b> |
|                          |                          |                           | -                                                                 | <b>729</b> | <b>737</b> | <b>733</b> |
